# Supplementary material for: Fabrication of hollow pompon-like Co3O4 nanostructures with rich defects and high-index facet exposure for enhanced oxygen evolution catalysis
Source: Royal Society of Chemistry journal article supplement (doi:10.1039/c9ta00330d), 2019-01-01
Supplement: c9ta00330d1.pdf [file c9ta00330d1.pdf]

Electronic Supplementary Information

**Fabrication of hollow pompon-like Co<sub>3</sub>O<sub>4</sub> nanostructure with rich defects and high-index facets exposure for enhanced oxygen evolution catalysis**

Chunmei Zhang,<sup>a, b</sup> Fuqin Zheng,<sup>a, b</sup> Ziwei Zhang,<sup>a, c</sup> Dong Xiang,<sup>a, d</sup> Chunfeng

Cheng,<sup>a, b</sup> Zhihua Zhuang,<sup>a, c</sup> Ping Li,<sup>a, c</sup> Xiaokun Li,<sup>a</sup> and Wei Chen <sup>\*a, c</sup>

<sup>a</sup>*State Key Laboratory of Electroanalytical Chemistry, Changchun Institute of Applied Chemistry,*

*Chinese Academy of Sciences, Changchun 130022, Jilin, China*

<sup>b</sup>*University of Chinese Academy of Sciences, Beijing 100039, China*

<sup>c</sup>*University of Science and Technology of China, Hefei 230029, Anhui, China*

<sup>d</sup>*Northeast Normal University, Changchun, 130024, P. R. China*

\*Corresponding author, E-mail: [weichen@ciac.ac.cn](mailto:weichen@ciac.ac.cn)

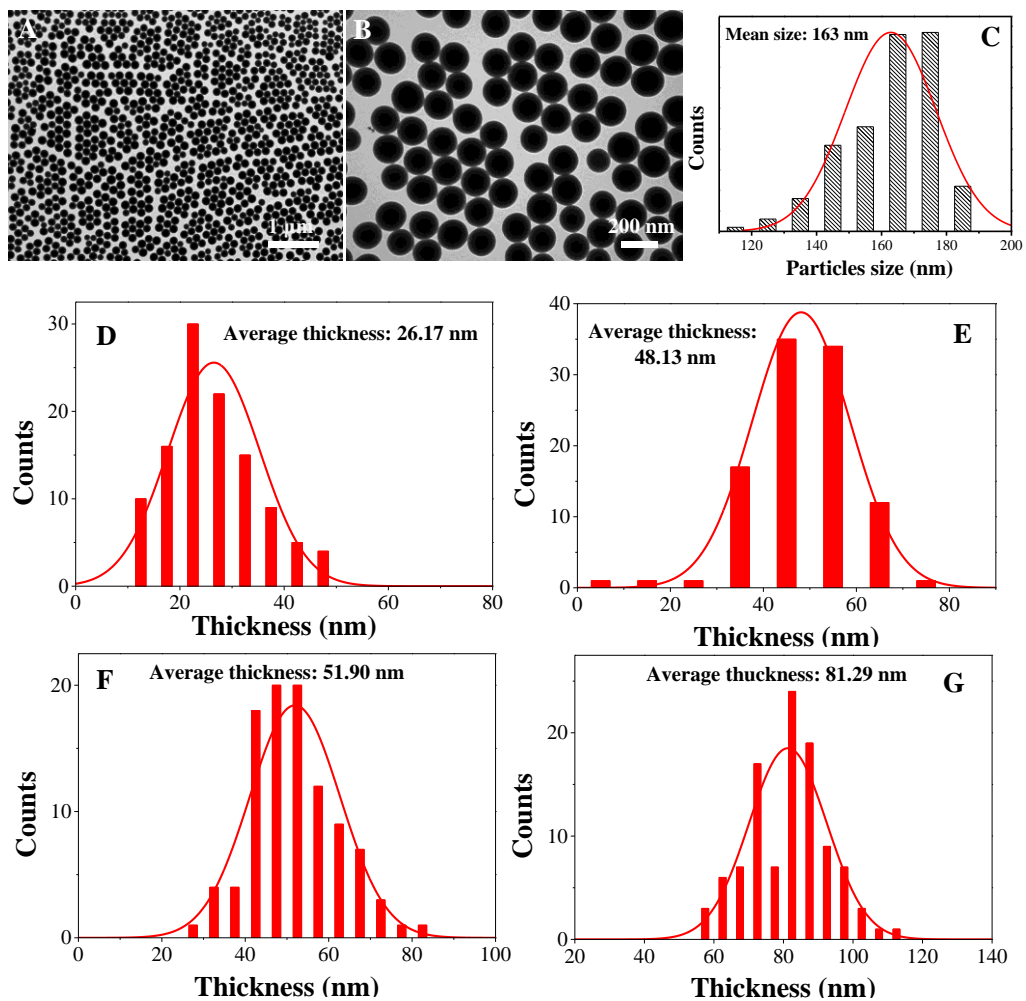

**Fig. S1** TEM images of SiO<sub>2</sub> spheres at low (A) and high (B) magnifications; (C) Particle size distribution histogram of SiO<sub>2</sub> spheres. The distribution histograms of the average thickness of coating layer on SiO<sub>2</sub> spheres at different reaction times: (D) 4 h, (E) 8 h, (F) 12 h and (G) 24 h.

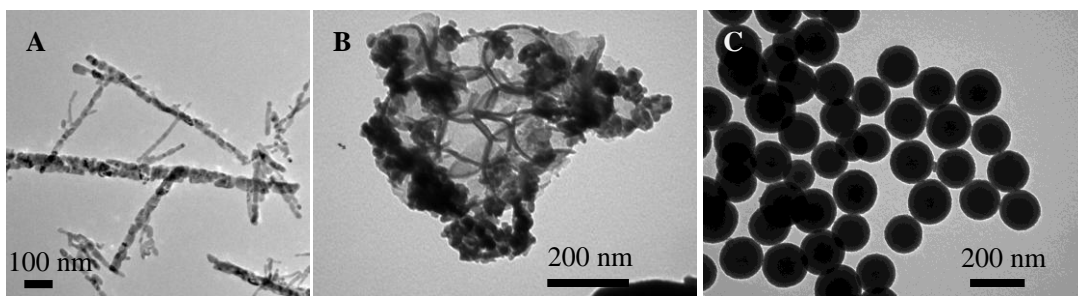

**Fig. S2** TEM images of products obtained at 95 °C for 8 h (A) without adding SiO<sub>2</sub> sphere templates, (B) using NPHCSs as templates and (C) without adding urea.

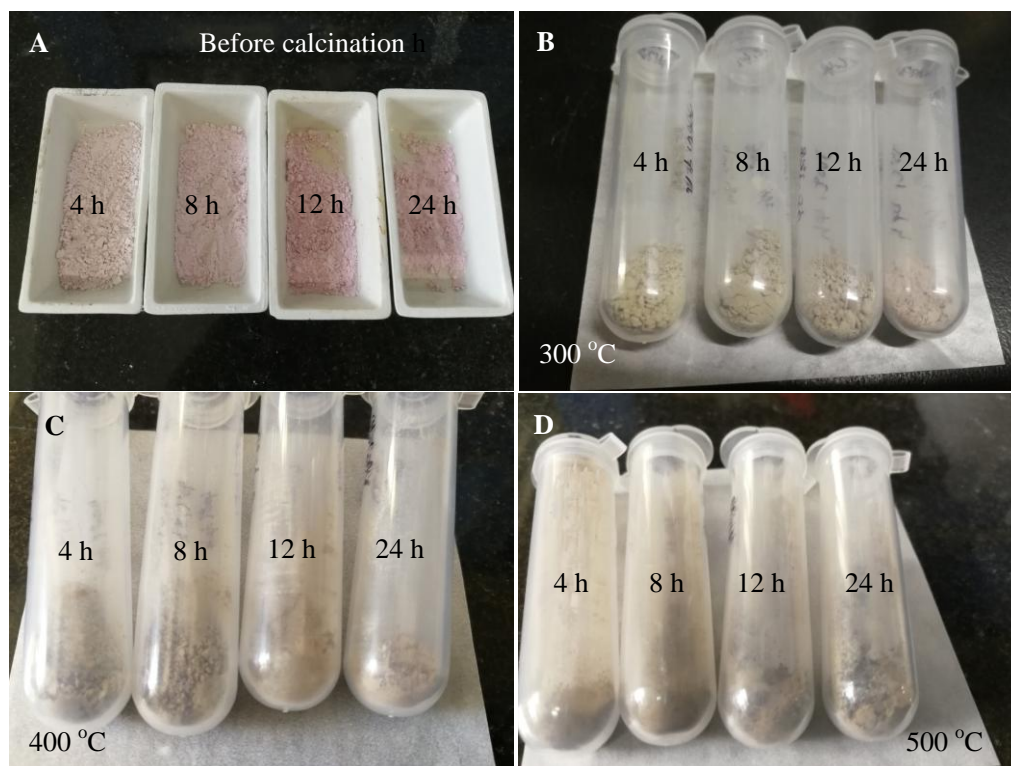

**Fig. S3** Photographs of the samples prepared for different reaction times (4-24 h) taken before calcination (A) and after calcination at different temperatures (B) 300 °C, (C) 400 °C and (D) 500 °C.

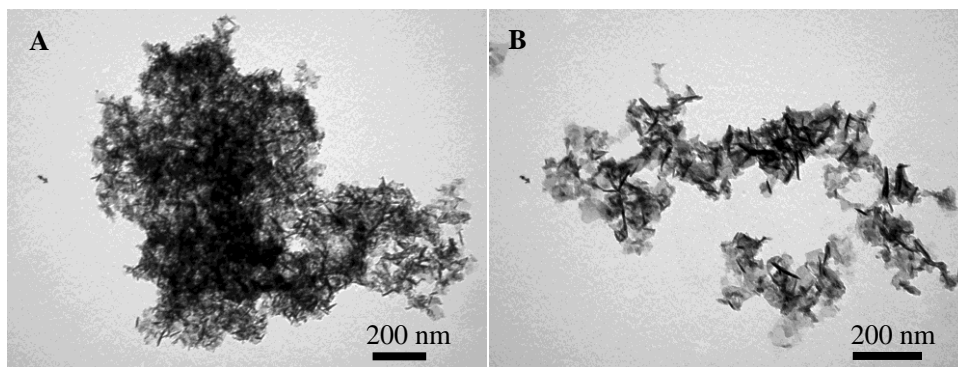

**Fig. S4** TEM images of the products by removing SiO<sub>2</sub> templates at different temperatures: (A) 80 °C, (B) 50 °C.

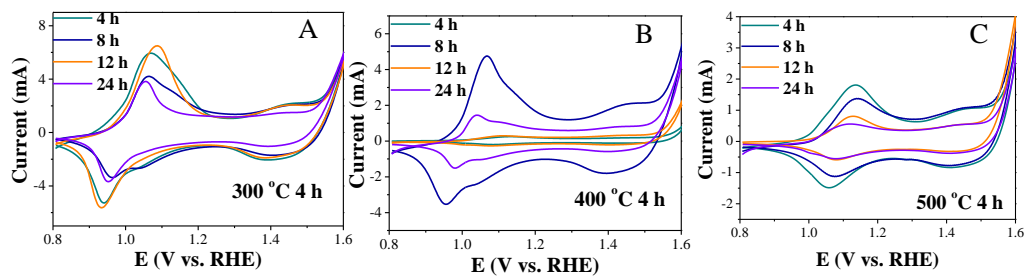

**Fig. S5** CV curves of the  $\text{Co}_3\text{O}_4$  HPNSs prepared at different calcination temperatures of (A) 300 °C, (B) 400 °C, and (C) 500 °C in  $\text{N}_2$ -saturated 1 M KOH with potential scan rate of  $50 \text{ mV s}^{-1}$ .

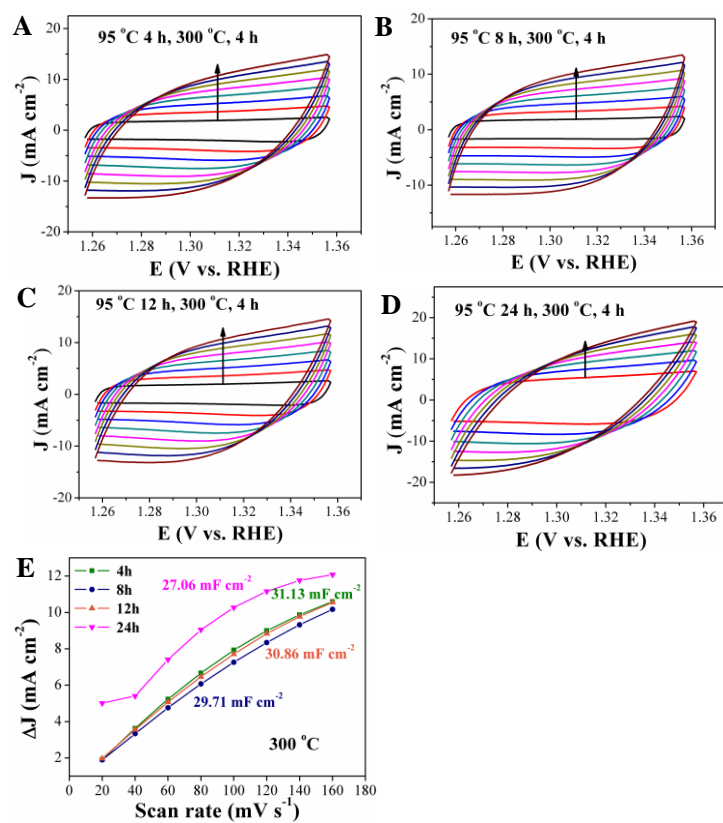

**Fig. S6** CV curves of the  $\text{Co}_3\text{O}_4$  HPNSs prepared with different reaction times: (A) 4 h, (B) 8 h, (C) 12 h and (D) 24 h after calcination at  $300^\circ\text{C}$  for 4 h at different scan rates from 20 to  $160\text{ mV s}^{-1}$ , (E) The corresponding plots of current density at  $1.31\text{ V}$  against scan rates for the four samples.

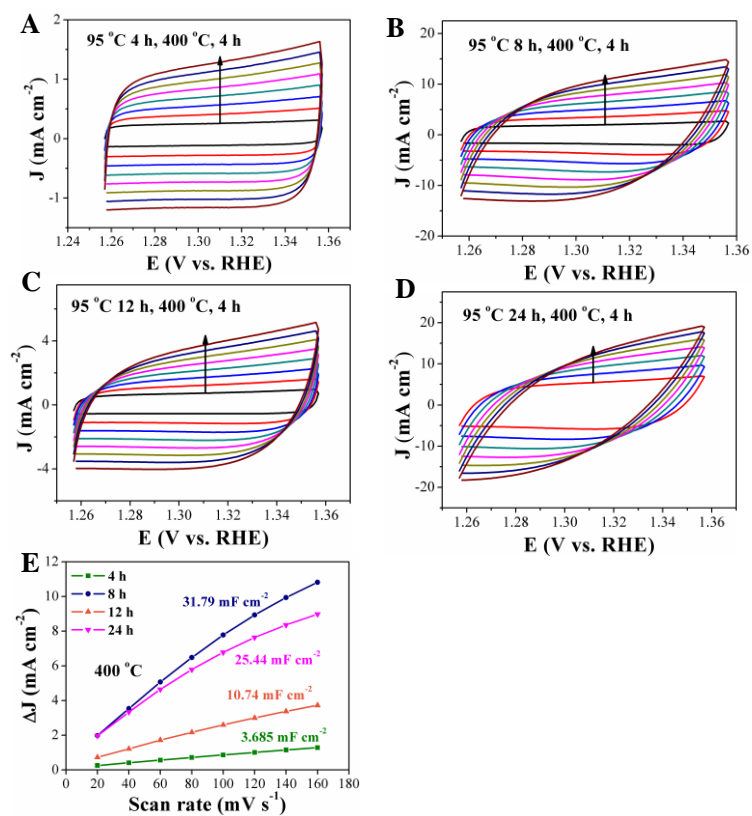

**Fig. S7** CV curves of the  $\text{Co}_3\text{O}_4$  HPNSs prepared with different reaction times: (A) 4 h, (B) 8 h, (C) 12 h and (D) 24 h after calcination at  $400^\circ\text{C}$  for 4 h at different scan rates from 20 to  $160\text{ mV s}^{-1}$ , (E) The corresponding plots of current density at  $1.31\text{ V}$  against scan rates for the four samples.



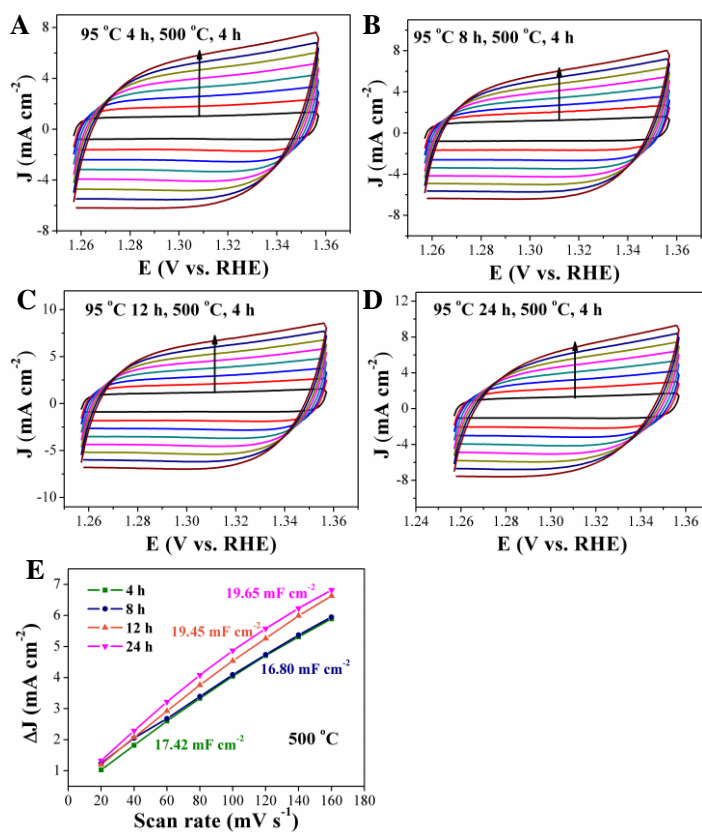

**Fig. S8** CV curves of the  $\text{Co}_3\text{O}_4$  HPNSs prepared with different reaction times: (A) 4 h, (B) 8 h, (C) 12 h and (D) 24 h after calcination at  $500^\circ\text{C}$  for 4 h at different scan rates from 20 to  $160\text{ mV s}^{-1}$ , (E) The corresponding plots of current density at  $1.31\text{ V}$  against scan rates for the four samples.

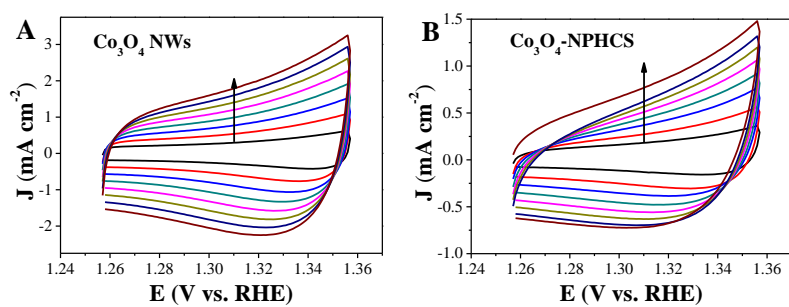

**Fig. S9** CV curves of the  $\text{Co}_3\text{O}_4$  NWs (A) and the  $\text{Co}_3\text{O}_4$ -NPHCS (B) measured in a non-Faradaic region at different scan rates from 20 to 160  $\text{mV s}^{-1}$ .

**Table S1.** Comparison of the OER activities of Co-based electrocatalysts in alkaline solution

| Material                                                                                                          | Current density<br>(mA cm <sup>-2</sup> ) | Overpotential<br>(mV) | Reference        |
|-------------------------------------------------------------------------------------------------------------------|-------------------------------------------|-----------------------|------------------|
| Co <sub>3</sub> O <sub>4</sub> /CoMoO <sub>4</sub> nanocages                                                      | 10                                        | 318                   | 1                |
|                                                                                                                   | 20                                        | 346                   |                  |
|                                                                                                                   | 50                                        | 404                   |                  |
| Co <sub>3</sub> O <sub>4</sub> film                                                                               | 10                                        | 377                   | 2                |
| Hollow fluffy Co <sub>3</sub> O <sub>4</sub> cages-250                                                            | 10                                        | 409                   | 3                |
|                                                                                                                   | 20                                        | 431                   |                  |
|                                                                                                                   | 50                                        | 467                   |                  |
|                                                                                                                   | 100                                       | 500                   |                  |
| (112)faceted porous Co <sub>3</sub> O <sub>4</sub> nanosheets                                                     | 10                                        | 318                   | 4                |
| Co <sub>3</sub> O <sub>4-x</sub> -carbon hollow polyhedrons                                                       | 10                                        | 400                   | 5                |
| Ultrathin Co <sub>3</sub> O <sub>4</sub> nanomeshes                                                               | 10                                        | 307                   | 6                |
|                                                                                                                   | 100                                       | 407                   |                  |
| Co <sub>3</sub> O <sub>4</sub> -nitrogen doped hierarchically porous carbon                                       | 10                                        | 420                   | 7                |
| Reduced mesoporous Co <sub>3</sub> O <sub>4</sub> nanowires                                                       | 13.1                                      | 420                   | 8                |
| Ni <sub>0.6</sub> Co <sub>1.4</sub> P                                                                             | 10                                        | 300                   | 9                |
| CoP                                                                                                               |                                           | 370                   |                  |
| CoPt@Co(OH) <sub>2</sub>                                                                                          | 10                                        | 334                   | 10               |
| Co/N-doped graphene                                                                                               | 10                                        | 340                   | 11               |
| Phosphorus-driven mesoporous Co <sub>3</sub> O <sub>4</sub> nanosheets                                            | 20                                        | 338                   | 12               |
| Iron-cobalt oxide nanosheets                                                                                      | 10                                        | 308                   | 13               |
| Fe <sub>1</sub> Co <sub>1</sub> -ONSs                                                                             |                                           |                       |                  |
| Co@N-C materials:                                                                                                 | 10                                        | 350                   | 14               |
| C-MOF-C2-900                                                                                                      |                                           | 420                   |                  |
| C-MOF-C2-800                                                                                                      |                                           | 500                   |                  |
| C-MOF-C2-1000                                                                                                     |                                           |                       |                  |
| CoO <sub>x</sub> nanoparticles rich in oxygen vacancies grown on B,N-decorated graphene(CoO <sub>x</sub> NPs/BNG) | 10                                        | 295                   | 15               |
| P-Co <sub>3</sub> O <sub>4</sub>                                                                                  | 10                                        | 280                   | 16               |
| V <sub>6</sub> -Co <sub>3</sub> O <sub>4</sub>                                                                    |                                           | 330                   |                  |
| Co(OH) <sub>2</sub> @N-doped carbon nanotubes@nickel foam                                                         | 10                                        | 270                   | 17               |
|                                                                                                                   | 100                                       | 410                   |                  |
| Co <sub>3</sub> O <sub>4</sub> NWs                                                                                | 10                                        | 370                   | <b>This work</b> |
|                                                                                                                   | 20                                        | 404                   |                  |
|                                                                                                                   | 50                                        | 435                   |                  |
|                                                                                                                   | 100                                       | 468                   |                  |
| Co <sub>3</sub> O <sub>4</sub> -NPHCS                                                                             | 10                                        | 370                   | <b>This work</b> |
|                                                                                                                   | 20                                        | 400                   |                  |
|                                                                                                                   | 50                                        | 439                   |                  |
|                                                                                                                   | 100                                       | 504                   |                  |
| Co <sub>3</sub> O <sub>4</sub> HPNSs-400                                                                          | 10                                        | 308                   | <b>This work</b> |
|                                                                                                                   | 20                                        | 320                   |                  |
|                                                                                                                   | 50                                        | 348                   |                  |
|                                                                                                                   | 100                                       | 370                   |                  |

**Table S2** BET surface areas and pore sizes of various Co<sub>3</sub>O<sub>4</sub> materials.

| Material                                                        | BET surface area (m <sup>2</sup> g <sup>-1</sup> ) | Reference        |
|-----------------------------------------------------------------|----------------------------------------------------|------------------|
| Co <sub>3</sub> O <sub>4</sub> nanocube                         | 24.67                                              |                  |
| Co <sub>3</sub> O <sub>4</sub> nanobelt                         | 21.53                                              | 18               |
| Co <sub>3</sub> O <sub>4</sub> nanooctahedron                   | 30.34                                              |                  |
| Co <sub>3</sub> O <sub>4</sub> nanosheet                        | 51.94                                              |                  |
| Co <sub>3</sub> O <sub>4</sub> -carbon porous nanowires arrays  | 251                                                | 19               |
| Uncalcined Co <sub>3</sub> O <sub>4</sub> spheres               | 125.5                                              |                  |
| Double-shelled Co <sub>3</sub> O <sub>4</sub> hollow spheres    | 40.1                                               |                  |
| Triple-shelled Co <sub>3</sub> O <sub>4</sub> hollow spheres    | 77.6                                               | 20               |
| Quadruple-shelled Co <sub>3</sub> O <sub>4</sub> hollow spheres | 10.4                                               |                  |
| Quintuple-shelled Co <sub>3</sub> O <sub>4</sub> hollow spheres | 81.6                                               |                  |
| Co <sub>3</sub> O <sub>4</sub> nanocubes                        | 24.2                                               |                  |
| Pseudo octahedral Co <sub>3</sub> O <sub>4</sub>                | 23.6                                               |                  |
| (110) facets exposed nanosheets                                 | 18.5                                               | 21               |
| (111) facets exposed hexagonal nanoplates                       | 79.3                                               |                  |
| (112) facets exposed nanolaminars                               | 214.7                                              |                  |
| Co <sub>3</sub> O <sub>4</sub> ultrathin nanosheet arrays       | 158.85                                             | 22               |
| Co <sub>3</sub> O <sub>4</sub> microflowers                     | 61.37 (cm <sup>2</sup> g <sup>-1</sup> )           | 23               |
| Reduced Co <sub>3</sub> O <sub>4</sub> nanowires                | 54                                                 | 8                |
| Co <sub>3</sub> O <sub>4</sub> nanosheets                       | 100.42                                             | 24               |
| Ultrathin Co <sub>3</sub> O <sub>4</sub> nanomeshes             | 208.64                                             | 6                |
| Cubic Co <sub>3</sub> O <sub>4</sub> -18 nm                     | 70                                                 |                  |
| Cubic Co <sub>3</sub> O <sub>4</sub> -9 nm                      | 150                                                | 25               |
| Triangular Co <sub>3</sub> O <sub>4</sub> -9 nm                 |                                                    |                  |
| Reduced Co <sub>3</sub> O <sub>4</sub>                          | 29.15                                              | 26               |
| Pristine Co <sub>3</sub> O <sub>4</sub>                         | 21.37                                              |                  |
| Co <sub>3</sub> O <sub>4</sub> /N-doped hollow carbon spheres   | 232                                                | 27               |
| Co <sub>3</sub> O <sub>4</sub> NWs                              | 28.78                                              | <b>This work</b> |
| Co <sub>3</sub> O <sub>4</sub> HPNS-400                         | 233.5                                              | <b>This work</b> |

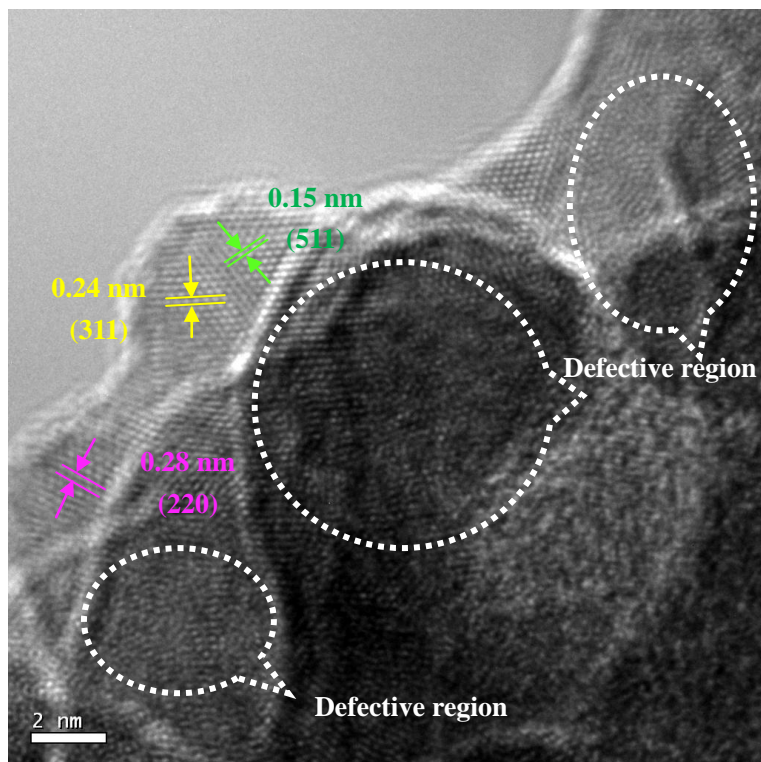

**Fig. S10** HRTEM image of the short burrs on the surface of Co<sub>3</sub>O<sub>4</sub> HPNS-400.

## References

- 1 L. J. Zhang, T. Q. Mi, M. A. Ziaee, L. F. Liang and R. H. Wang, *J. Mater. Chem. A*, 2018, **6**, 1639-1647.
- 2 H. S. Jeon, M. S. Jee, H. Kim, S. J. Ahn, Y. J. Hwang and B. K. Min, *ACS Appl. Mater. Inter.*, 2015, **7**, 24550-24555.
- 3 X. Zhou, X. Shen, Z. Xia, Z. Zhang, J. Li, Y. Ma and Y. Qu, *ACS Appl. Mater. Inter.*, 2015, **7**, 20322-20331.
- 4 R. Wei, M. Fang, G. Dong, C. Lan, L. Shu, H. Zhang, X. Bu and J. C. Ho, *ACS Appl. Mater. Inter.*, 2018, **10**, 7079-7086.
- 5 W. Xu, W. Xie and Y. Wang, *ACS Appl. Mater. Inter.*, 2017, **9**, 28642-28649.
- 6 Y. Li, F. M. Li, X. Y. Meng, S. N. Li, J. H. Zeng and Y. Chen, *ACS Catal.*, 2018, **8**, 1913-1920.
- 7 J. Guan, Z. Zhang, J. Ji, M. Dou and F. Wang, *ACS Appl. Mater. Inter.*, 2017, **9**, 30662-30669.
- 8 Y. C. Wang, T. Zhou, K. Jiang, P. M. Da, Z. Peng, J. Tang, B. A. Kong, W. B. Cai, Z. Q. Yang and G. F. Zheng, *Adv. Energy Mater.*, 2014, **4**, 1400696.
- 9 B. C. Qiu, L. J. Cai, Y. Wang, Z. Y. Lin, Y. P. Zuo, M. Y. Wang and Y. Chai, *Adv. Funct. Mater.*, 2018, **28**, 1706008.
- 10 B. Malik, S. Anantharaj, K. Karthick, D. K. Pattanayak and S. Kundu, *Catalysis Science & Technology*, 2017, **7**, 2486-2497.
- 11 Y. M. Shi, Y. T. Wang, Y. F. Yu, Z. Q. Niu and B. Zhang, *J. Mater. Chem. A*, 2017, **5**, 8897-8902.
- 12 Q. C. Xu, H. Jiang, H. X. Zhang, H. B. Jiang and C. Z. Li, *Electrochim. Acta*, 2018, **259**, 962-967.
- 13 L. Zhuang, L. Ge, Y. Yang, M. Li, Y. Jia, X. Yao and Z. Zhu, *Adv. Mater.*, 2017, **29**, 1606793.
- 14 M. Zhang, Q. Dai, H. Zheng, M. Chen and L. Dai, *Adv. Mater.*, 2018, **30**, 1705431.
- 15 Y. Tong, P. Chen, T. Zhou, K. Xu, W. Chu, C. Wu and Y. Xie, *Angew. Chem. Int. Ed. Engl.*, 2017, **56**, 7121-7125.
- 16 Z. H. Xiao, Y. Wang, Y. C. Huang, Z. X. Wei, C. L. Dong, J. M. Ma, S. H. Shen, Y. F. Li and S. Y. Wang, *Energ. Environ. Sci.*, 2017, **10**, 2563-2569.
- 17 P. Guo, J. Wu, X. B. Li, J. Luo, W. M. Lau, H. Liu, X. L. Sun and L. M. Liu, *Nano Energy*, 2018, **47**, 96-104.
- 18 L. Liu, Z. Jiang, L. Fang, H. Xu, H. Zhang, X. Gu and Y. Wang, *ACS Appl. Mater. Inter.*, 2017, **9**, 27736-27744.
- 19 T. Y. Ma, S. Dai, M. Jaroniec and S. Z. Qiao, *J. Am. Chem. Soc.*, 2014, **136**, 13925-13931.
- 20 Z. D. Wang, S. H. Qu, Y. H. Cheng, C. H. Zheng, S. Y. Chen and H. J. Wu, *Appl. Surf. Sci.*, 2017, **416**, 338-343.
- 21 D. Su, S. Dou and G. Wang, *Sci. Rep.*, 2014, **4**, 5767.
- 22 L. Zhang, B. R. Liu, N. Zhang and M. M. Ma, *Nano Res.*, 2018, **11**, 323-333.
- 23 F. Liao, X. R. Han, Y. F. Zhang, C. J. Xu and H. Y. Chen, *Mater. Lett.*, 2018, **215**, 179-182.
- 24 G. Zhang, J. Yang, H. Wang, H. Chen, J. Yang and F. Pan, *ACS Appl. Mater. Inter.*, 2017, **9**, 16159-16167.
- 25 L. Baoying, Z. Yihe, D. Ruifeng, L. Lei and Y. Xuelian, *Nanotechnology*, 2018, **29**, 105401.
- 26 Z. Cai, Y. M. Bi, E. Y. Hu, W. Liu, N. Dwarica, Y. Tian, X. L. Li, Y. Kuang, Y. P. Li, X. Q. Yang, H. L. Wang and X. M. Sun, *Adv. Energy Mater.*, 2018, **8**, 1701694.
- 27 T. Liu, L. Zhang, W. You and J. Yu, *Small*, 2018, **14**, 1702407.
